# Supplementary material for: Implementation of novel and conventional outbreak control measures in managing a COVID-19 outbreak in a large UK prison
Source: bioRxiv or medRxiv preprint supplement (doi:10.1101/2020.12.07.20234641), 2020-12-11
Supplement: Supplementary file [file media-1.pdf]

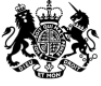

Public Health  
England

*PHE Research Support and Governance Office  
Porton Down  
Salisbury  
Wilts  
SP4 0JG*

2<sup>nd</sup> December 2020

For the attention of the medRxiv team

[www.phe.gov.uk](http://www.phe.gov.uk)

Dear Sir/Madam

**Re: Implementation of novel and conventional outbreak control measures in managing a COVID-19 outbreak in a large UK prison**

The above outbreak report was produced as part of PHE's responsibility to manage the COVID-19 outbreak. As it is not research it falls outside the remit for ethical review.

The report was subject to an internal review by the Research Ethics and Governance Group, which is the PHE ethics committee, and was found to be fully compliant with all regulatory requirements. As no regulatory issues were identified, and ethical review is not required for this type of work, it was decided that a full ethical review would not be needed, and the report was approved by the group.

I hope this has answered your question. Please let me know if you require any further information.

Yours faithfully

Dr Elizabeth Coates  
Head of Research Governance  
Public Health England
